# Supplementary material
Source: PubMed Central journal article supplement (PMC124444)
Supplement: pnas_092569199_1.pdf [file pnas_092569199_1.pdf]

Supporting information for Etz *et al.* (May 7, 2002) *Proc. Natl. Acad. Sci. USA*,

10.1073/pnas.092569199.

**Table 1. Immunogenic proteins frequently identified by bacterial surface display**

| ORF number (TIGR)   | Name, putative function or homology                                                     | Localization motif* | Gene distribution: positive/total <sup>†</sup> | Hits per ORF <sup>†</sup> |         |         |         | Location of antigenic region                                  | Reactivity with sera: positive/total (MACS recovery) <sup>§</sup> |
|---------------------|-----------------------------------------------------------------------------------------|---------------------|------------------------------------------------|---------------------------|---------|---------|---------|---------------------------------------------------------------|-------------------------------------------------------------------|
|                     |                                                                                         |                     |                                                | LamB                      |         | FhuA    |         |                                                               |                                                                   |
|                     |                                                                                         |                     |                                                | Patient                   | Healthy | Patient | Healthy |                                                               |                                                                   |
| SA0095              | Protein A                                                                               | SP, LPXTG           | 30/30                                          | 63                        | –       | 53      | 36      | aa 1–48<br>aa 47–143<br>aa 219–285<br>aa 345–424              | 20/28<br>1/1<br>17/28<br>37/71                                    |
| SA0209              | Coagulase                                                                               | SP                  | 30/30                                          | –                         | –       | –       | 26      | aa 438–516<br>aa 505–570<br>aa 569–619                        | 3/5<br>1/7<br>2/7                                                 |
| SA0317              | Lipase                                                                                  | SP                  | Variable (2)                                   | 45                        | –       | 42      | 3       | aa 48–136<br>aa 128–172<br>aa 201–258                         | 6/13<br>10/28 (100%)<br>7/28                                      |
| SA0470              | Putative Exotoxin 2                                                                     | SP                  | 29/30                                          | –                         | 3       | –       | 101     | aa 1–80<br>aa 49–116<br>aa 98–190                             | 6/7<br>25/28<br>13/17                                             |
| SA0507              | LysM domain protein                                                                     | SP                  | 30/30                                          | –                         | –       | 2       | 1       | aa 21–118                                                     | 50/52                                                             |
| SA0723 <sup>¶</sup> | LysM domain protein, homology with SA2581                                               | SP                  | 30/30                                          | –                         | –       | 58      | 18      | aa 45–105<br>aa 103–166<br>aa 66–153                          | 1/1<br>13/27<br>47/51                                             |
| SA0858              | Empbp, extracellular matrix and plasma-binding protein                                  | SP                  | 21/30                                          | 27                        | 2       | 50      | 15      | aa 22–56<br>aa 23–99<br>aa 97–115<br>aa 233–250<br>aa 245–265 | 58/71<br>59/59<br>1/1<br>ND<br>ND                                 |
| SA1062              | Atl, autolysin                                                                          | SP                  | 29/30                                          | 47                        | 5       | 22      | 61      | aa 6–66<br>aa 65–124<br>aa 590–604                            | 5/16<br>15/28<br>39/71                                            |
| SA1472              | Pathogenicity protein                                                                   | SP                  |                                                | –                         | –       | 10      | 30      | aa 8511–8640                                                  | 5/26 (100%)                                                       |
| SA1781              | LPXTGp5                                                                                 | SP, LPXTG           | 30/30                                          | 22                        | 3       | 1       | –       | aa 37–49<br>aa 63–77<br>aa 274–334                            | 1/1<br>12/70<br>4/28                                              |
| SA2004              | Putative leukocidin F precursor                                                         |                     |                                                | –                         | –       | 9       | –       | aa 158–220                                                    | 7/27 (100%)                                                       |
| SA2006              | Putative aerolysin                                                                      | SP                  | 30/30                                          | 3                         | 4       | 12      | 36      | aa 31–61<br>aa 58–74                                          | 19/27<br>49/71                                                    |
| SA2019              | Putative SdrH                                                                           | SP                  | 30/30                                          | 7                         | 9       | –       | –       | aa 122–139<br>aa 164–182                                      | ND<br>39/71                                                       |
| SA2291              | Homology with SA2581                                                                    | SP                  | 30/30                                          | 58                        | 42      | 224     | 169     | aa 137–237<br>aa 250–267                                      | 13/27<br>10/71                                                    |
| SA2295              | Homology with SA2581                                                                    | SP                  |                                                | 4                         | –       | 5       | –       | aa 38–52<br>aa 66–114                                         | ND<br>4/28                                                        |
| SA2418              | Sbi, IgG-binding protein                                                                | SP                  | 97% (3)                                        | 11                        | 23      | 1       | –       | aa 208–287<br>aa 286–314                                      | 38/46<br>11/71                                                    |
| SA2505              | LPXTGp4                                                                                 | SP, LPXTG           |                                                | –                         | 18      | 4       | 3       | aa 491–585<br>aa 631–713<br>aa 702–758                        | 1/1<br>1/1<br>15/28                                               |
| SA2509              | FnbpB, Fibronectin binding                                                              | SP                  | 100% (4)                                       | –                         | 2       | 2       | 5       | aa 693–769<br>aa 775–814                                      | 26/26<br>1/1                                                      |
| SA2511              | FnbpA, Fibronectin binding                                                              | SP                  | 100% (4)                                       | –                         | 2       | 4       | 4       | aa 710–787<br>aa 855–975                                      | 19/25<br>ND                                                       |
| SA2581              | Staphyloxanthin biosynthesis protein, homolog of <i>Staphylococcus epidermidis</i> SsaA | SP                  | 26/30                                          | 51                        | 43      | 130     | 13      | aa 916–983<br>aa 7–87<br>aa 133–242                           | 15/28<br>1/1<br>5/27 (100%)                                       |

| ORF number (TIGR) | Name, putative function or homology | Localization motif* | Gene distribution: positive/total <sup>‡</sup> | Hits per ORF <sup>‡</sup> |         |         |         | Location of antigenic region         | Reactivity with sera: positive/total (MACS recovery) <sup>§</sup> |
|-------------------|-------------------------------------|---------------------|------------------------------------------------|---------------------------|---------|---------|---------|--------------------------------------|-------------------------------------------------------------------|
|                   |                                     |                     |                                                | LamB                      |         | FhuA    |         |                                      |                                                                   |
|                   |                                     |                     |                                                | Patient                   | Healthy | Patient | Healthy |                                      |                                                                   |
| SA2584            | IsaA                                | SP                  | 30/30                                          | 69                        | 2       | 8       | 3       | aa 67–116<br>aa 98–184<br>aa 182–225 | 1/1<br>20/26<br>34/71                                             |
| SA2659<br>SAA0001 | Aureolysin<br>repC                  | SP                  | 100% (5)                                       | –<br>–                    | –<br>6  | 1<br>–  | 6<br>18 | aa 83–156<br>aa 9–42<br>aa 158–174   | 13/27<br>1/1<br>1/1                                               |

Screens of two libraries with two serum pools each are summarized: LSA250 library in FhuA with patient serum P1 (655 clones analyzed) and with serum from healthy individuals N1 (680); LSA50 library in LamB with patient sera P1 (498) and with serum from healthy individuals N2 (900). Only a selection of frequently identified antigens is shown. \*, Motifs characteristic of secreted or surface exposed proteins: SP, signal peptide; LPXTG, sortase anchoring motif; †, PCR analysis was performed with oligonucleotides designed to amplify approximately 500- to 1,000-bp fragments covering at least one antigenic epitope. Twenty-four *Staphylococcus aureus* strains were isolated from patients and three strains from healthy individuals and typed according to restriction fragment length polymorphism (RFLP) of the *spa* and *coa* genes (1). The three laboratory strains, COL, Newman, and 8325-4, were used as controls. PCR products of variable size were obtained for the SA2019, SA0095, and SA0209 genes. Sequencing of the PCR products revealed that the size difference was due to a variable copy number of a repetitive DNA sequence in these three genes. ‡, The number of clones identified per ORF is given for the individual screens. Representative clones were analyzed further. §, One epitope of the indicated region was chosen for Western blot analysis with individual sera. Several epitopes identified frequently were not or were only very weakly reactive in Western blot analysis indicating the presence of conformational epitopes. These clones were therefore tested in MACS experiments where the rate of specific recovery with biotinylated patient serum P1 is expressed as percentage of the input

(shown in brackets). ¶, Identified 18 times of 33 in a FhuA prescreen with serum from healthy individuals N1, and was therefore eliminated from the library prior to screen FhuA with N1. ND, not determined; MACS, magnetic cell sorting.

## References

1. VandenBergh, M. F., Yzerman, E. P., van Belkum, A., Boelens, H. A., Sijmons, M. & Verbrugh, H. A. (1999) *J. Clin. Microbiol.* **37**, 3133–3140.
2. Lee, C. Y. & Iandolo, J. J. (1986) *J. Bacteriol.* **166**, 385–391.
3. Zhang, L., Jacobsson, K., Ström, K., Lindberg, M. & Frykberg, L. (1999) *Microbiology* **145**, 177–183.
4. Smeltzer, M. S., Gillaspay, A. F., Pratt, F. L., Jr., Thames, M. D. & Iandolo, J. I. (1997) *Gene* **196**, 249–259.
5. Sabat, A., Kosowska, K., Poulsen, K., Kasprowicz, A., Sekowska, A., van Den Burg, B., Travis, J. & Potempa, J. (2000) *Infect. Immun.* **68**, 973–976.
